# Supplementary material for: Enhanced antitumor immunity through sequential targeting of PI3Kδ and LAG3
Source: PubMed Central journal article supplement (PMC7583804; doi:10.1136/jitc-2020-000693), 2020-10-22
Supplement: jitc-2020-000693supp001.pdf [file jitc-2020-000693supp001.pdf]

## Supplementary Figure 1

A

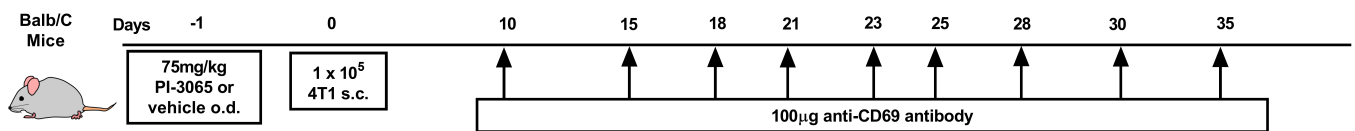

B

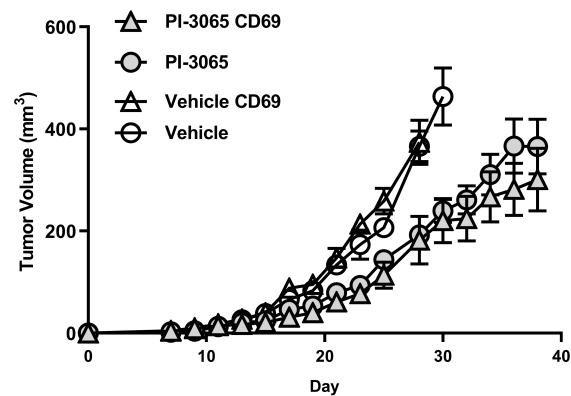

**Supplementary Figure 1: anti-CD69 and PI3K $\delta$  combination therapy does not alter tumor burden.** (A) Schematic diagram shows the experimental protocol: Balb/C mice were treated daily for the duration of the study with either 75mg/kg of PI-3065 or vehicle by oral gavage and were administered anti-CD69 antibody (100µg) at the days indicated (8 mice/group). (B) Tumor growth curves from mice treated with PI-3065 or vehicle  $\pm$  anti-CD69. All data is displayed as the mean  $\pm$  SEM.
