# Supplementary material for: Enhanced antitumor immunity through sequential targeting of PI3Kδ and LAG3
Source: PubMed Central journal article supplement (PMC7583804; doi:10.1136/jitc-2020-000693), 2020-10-22
Supplement: jitc-2020-000693supp002.pdf [file jitc-2020-000693supp002.pdf]

Supplementary Figure 2

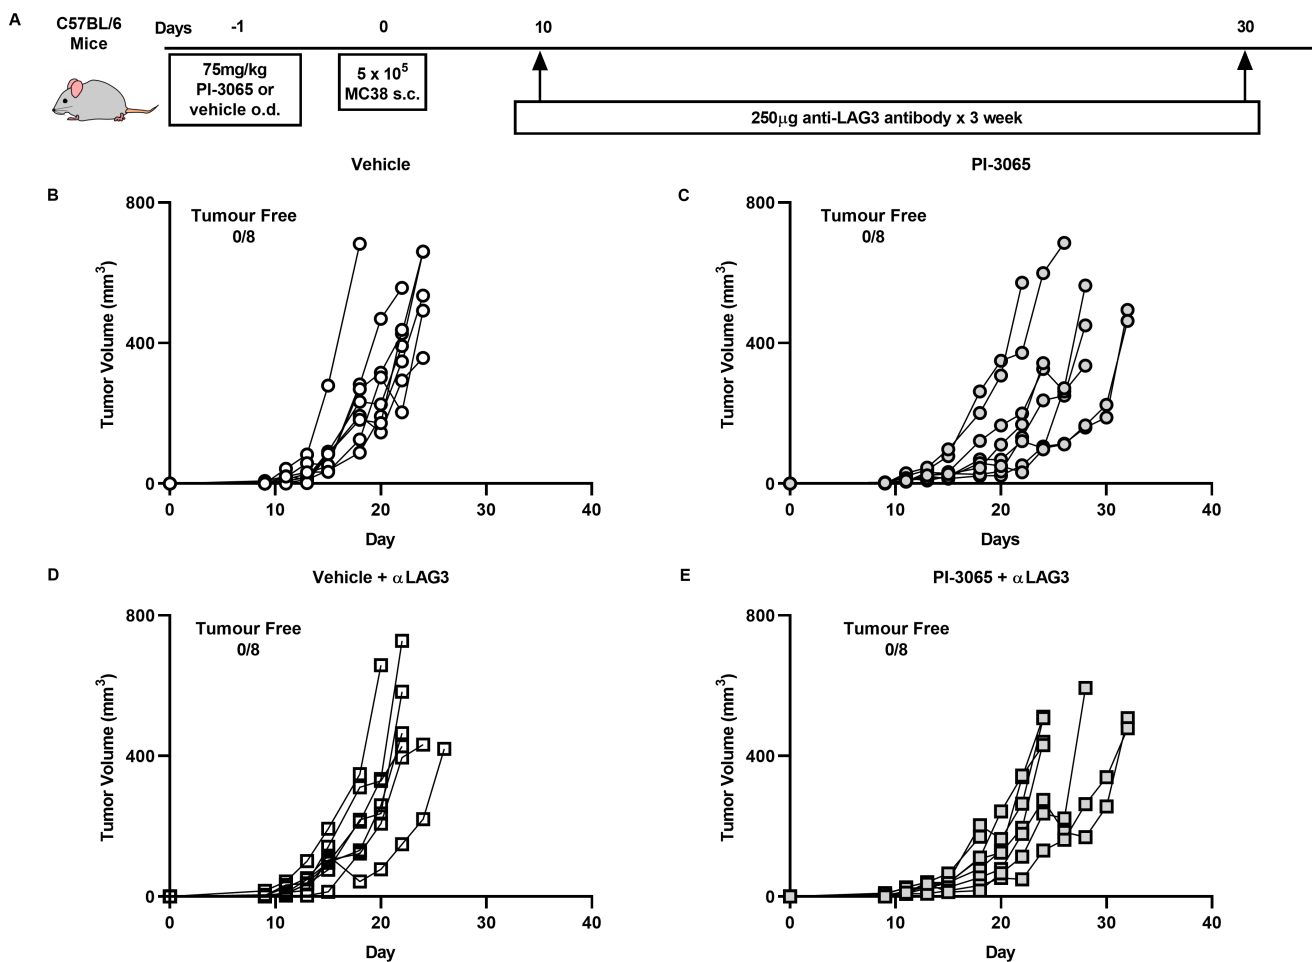

**Supplementary Figure 2: Successful PI3K $\delta$  combination therapy is tumour model dependent.** (A) Schematic diagram shows the experimental protocol: MC38 mice were treated daily for the duration of the study with either 75mg/kg of PI-3065 or vehicle by oral gavage and were administered anti-LAG3 (250µg) at the days indicated (8 mice/group). Individual growth curves from MC38 tumour bearing mice treated with (B) vehicle (C) PI-3065 (D) vehicle + anti-LAG3 or (E) PI-3065 + anti-LAG3.
