# Supplementary material for: Enhanced antitumor immunity through sequential targeting of PI3Kδ and LAG3
Source: HighWire-hosted journal article supplement (doi:10.1136/jitc-2020-000693), 2020-10-01
Supplement: jitc-2020-000693supp003_data_supplement.pdf [file jitc-2020-000693supp003_data_supplement.pdf]

## Supplementary Figure 3

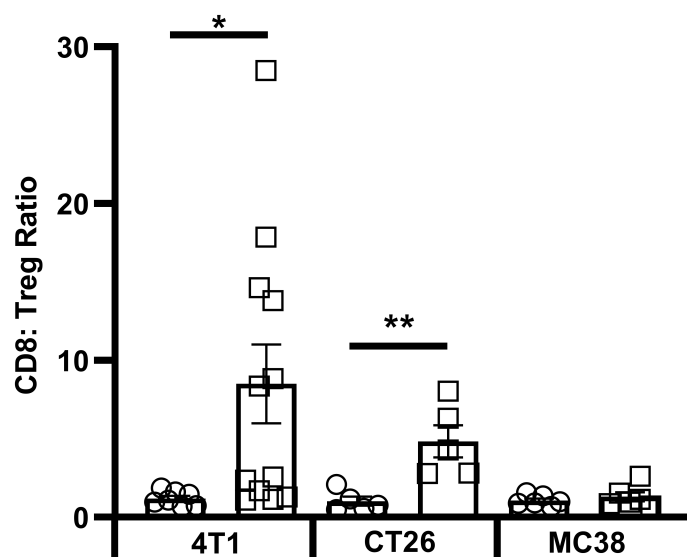

**Supplementary Figure 3: High CD8:Treg ratio enables tumour control.** The ratio of tumoural CD8:Tregs in the three tumour models. Data is displayed as the mean  $\pm$  SEM (5 - 12 mice/group). Statistical significance was determined by unpaired T test.
